# Supplementary material for: Tumor-derived microRNAs induce myeloid suppressor cells and predict immunotherapy resistance in melanoma
Source: JCI journal article supplement (doi:10.1172/jci98060), 2018-09-27
Supplement: sd1 [file 1]

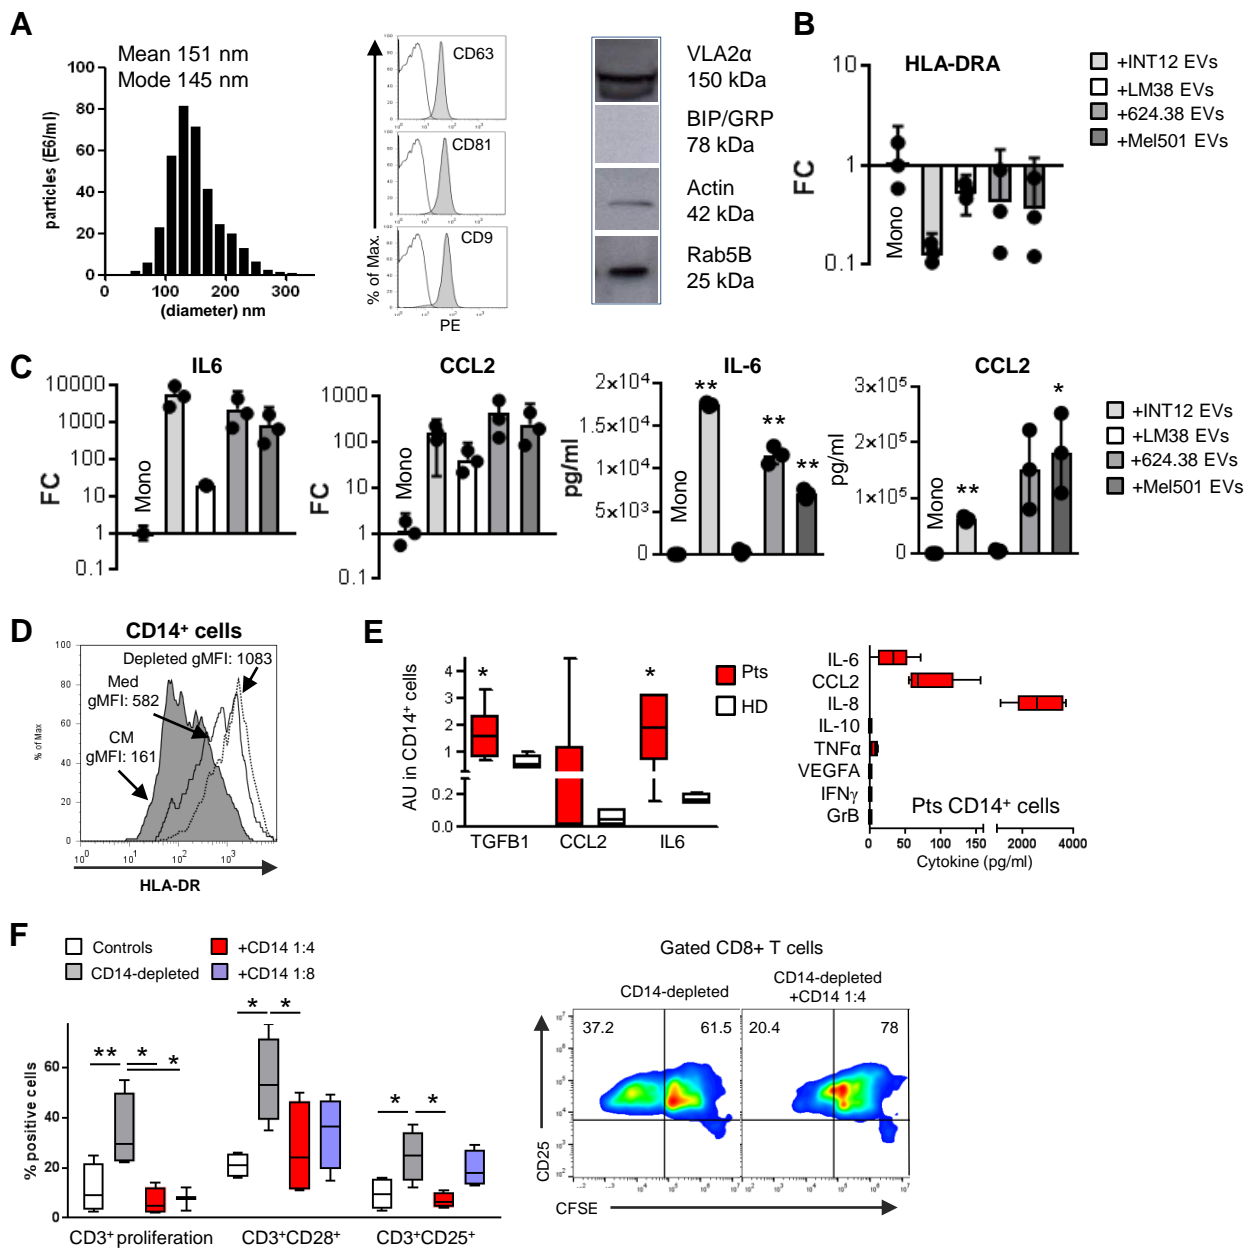

**Supplemental Figure 1. Melanoma EVs convert myeloid cells into MDSCs.** (A) Particle concentration and distribution by NTA in a preparation of melanoma EVs isolated from conditioned medium of INT12 melanoma cells (left). Expression of EV markers CD63, CD81 and CD9 determined by flow cytometry after incubation with specific PE-conjugated Abs of latex bead-coupled EVs (middle). Western blot analysis of EV marker Rab5B, actin and VLA2 $\alpha$ . The absence of BIP protein confirmed purity of isolated vesicles (right). Data shown are representative of 5 melanoma EV preparations. (B, C) HLA-DRA, IL6 and CCL2 expression and production in monocytes conditioned or not with melanoma EVs from different cell lines (INT12, LM38, 624.38 and Mel501). (D) HLA-DR expression, measured by flow cytometry in HD monocytes after incubation with EV depleted (Depleted) compared to undepleted conditioned medium (CM) and to control medium (Med). (E) Cytokine expression in isolated CD14<sup>+</sup> cells from patients and HD (n=6/group) (left), and cytokine production (right). (F) T cell proliferation of PBMCs from melanoma patients (n=4) after mock depletion, depletion of CD14<sup>+</sup> cells and re-addition of CD14<sup>+</sup> at the indicated T cells:monocyte ratio (left); proliferation of CD8<sup>+</sup> is shown (right). FC, fold change by using as the calibrator untreated monocytes; AU, arbitrary units.  $P < 0.001$  by paired Student's *t*-test (B,C left panels). \* $P < 0.05$ , \*\* $P < 0.01$  by paired Student's *t*-test (C right panels, F). \* $P < 0.05$  by Mann-Whitney *U*-test (E). For (B) and (C) experiments were repeated twice and performed in triplicates.

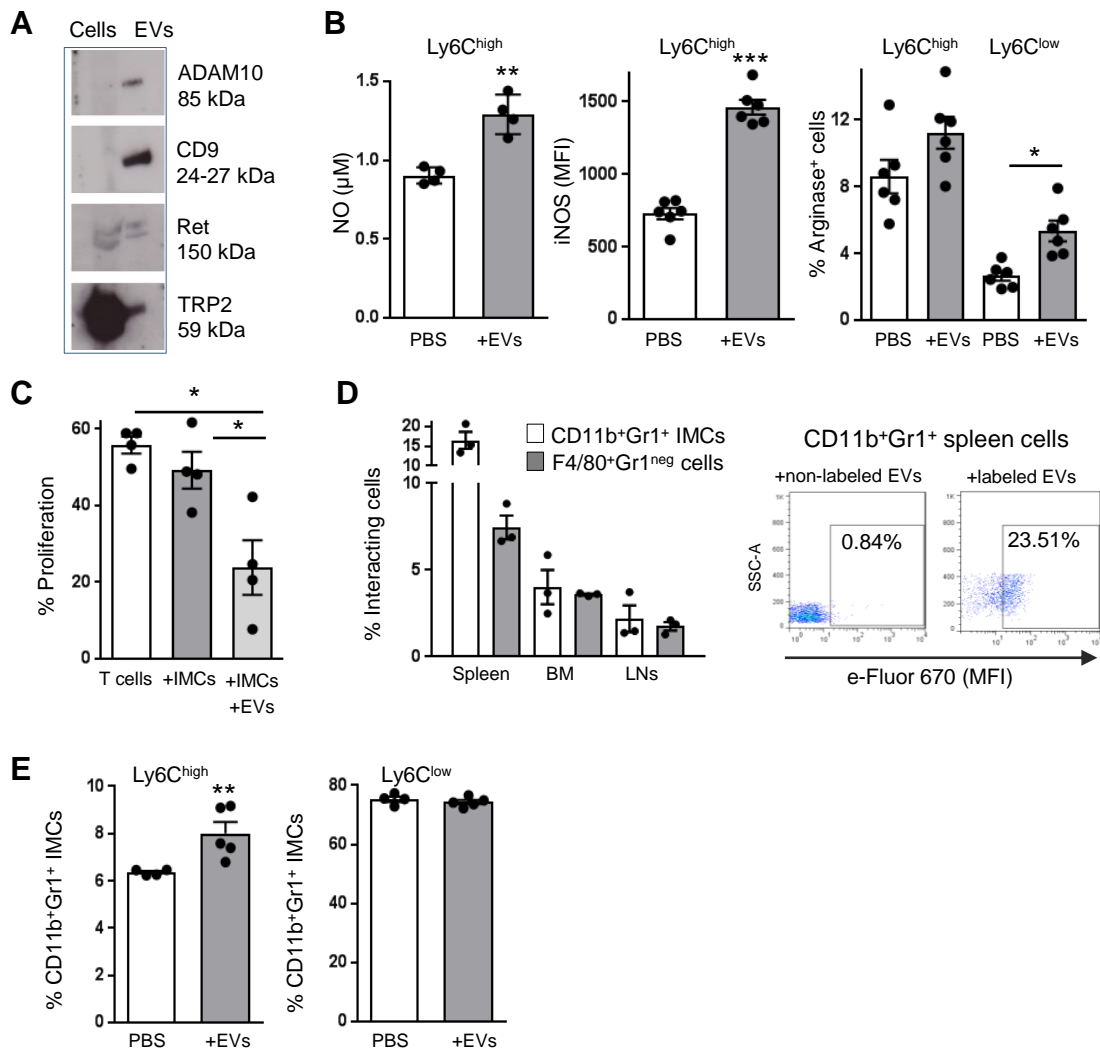

**Supplemental Figure 2. Melanoma EV induction of MDSC phenotype in vivo.** (A) Analysis of *ret* murine melanoma cells and *ret*-derived EVs by Western blot. (B) Increased NO production and iNOS expression in BM-derived CD11b<sup>+</sup>Gr1<sup>+</sup> cells after in vitro incubation with *ret*-EVs (left). Arginase-I expression by monocytic and granulocytic subsets of CD11b<sup>+</sup>Gr1<sup>+</sup> IMCs from BM after in vitro incubation for 20 h with *ret*-EVs, as measured by flow cytometry (right). (C) Proliferative response of T cells cultured with CD11b<sup>+</sup>Gr1<sup>+</sup> IMCs treated or not with *ret*-EVs. (D) Interaction of murine CD11b<sup>+</sup>Gr1<sup>+</sup> IMCs and F4/80<sup>+</sup>Gr1<sup>neg</sup> macrophages with *ret*-EVs after i.p. injection (left). In vivo uptake of e-Fluor 670-labeled melanoma *ret*-EVs by CD11b<sup>+</sup>Gr1<sup>+</sup> spleen cells evaluated by flow cytometry (right). (E) Increased frequency of the Ly6C<sup>high</sup> monocytic MDSC subset compared to Ly6C<sup>low</sup> cells in BM-CD11b<sup>+</sup>Gr1<sup>+</sup> cells as evaluated by flow cytometry after *ret*-EVs i.p. injection. MFI, mean fluorescence intensity. Data are presented as mean  $\pm$  SEM. \*P<0.05, \*\*P<0.01, \*\*\*P<0.001 by paired and unpaired (E) Student's *t*-test. At least three independent experiments were performed with n=3-6 animals/group.

**A**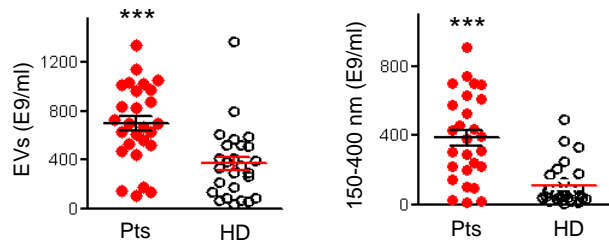**B**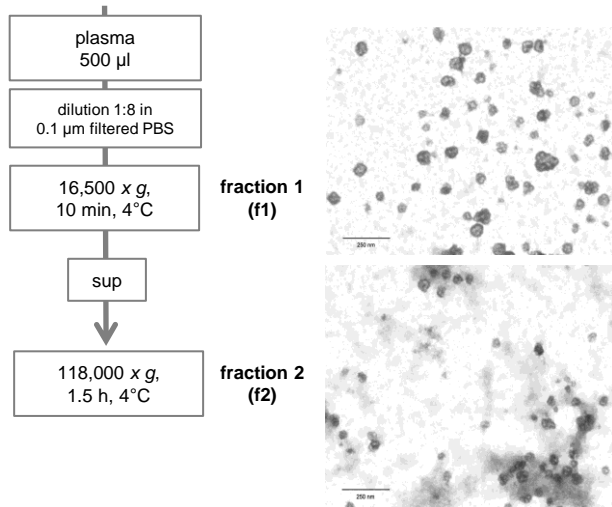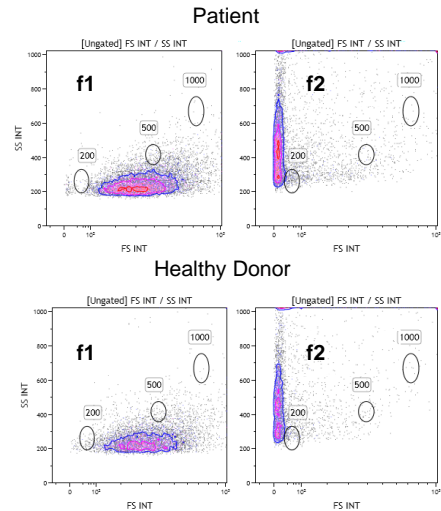

**Supplemental Figure 3. Isolation of plasma EVs.** (A) NTA evaluation of EV number and size in plasma samples of patients and HD (n=27/group). (B) Plasma samples were processed to obtain f1 and f2 and evaluated by TEM (left). Fractions, isolated from plasma of a healthy donor and a melanoma patient, were analyzed by flow cytometry using a Gallios flow cytometer calibrated with 200 nm, 500 nm and 1000 nm beads. Representative dot plots are shown (right). \*\*\*P < 0.001 by unpaired Student's *t*-test.

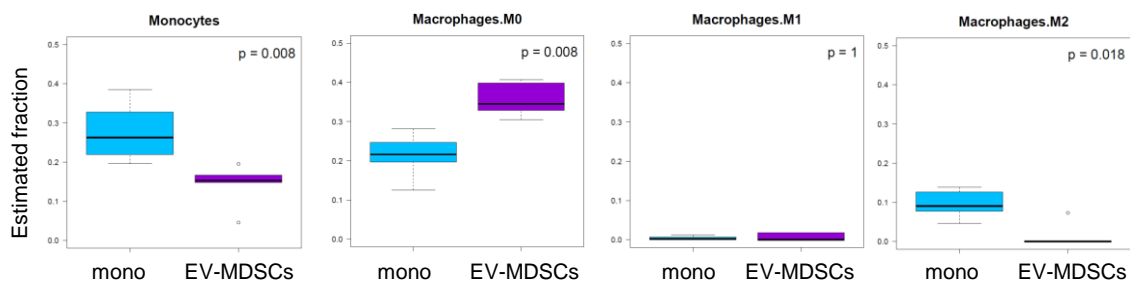

**Supplemental Figure 4. CIBERSORT analysis of EV-MDSCs.** CIBERSORT analysis of GEP data obtained from monocytes vs EV-MDSCs. EV-MDSCs associate with a M0 profile.

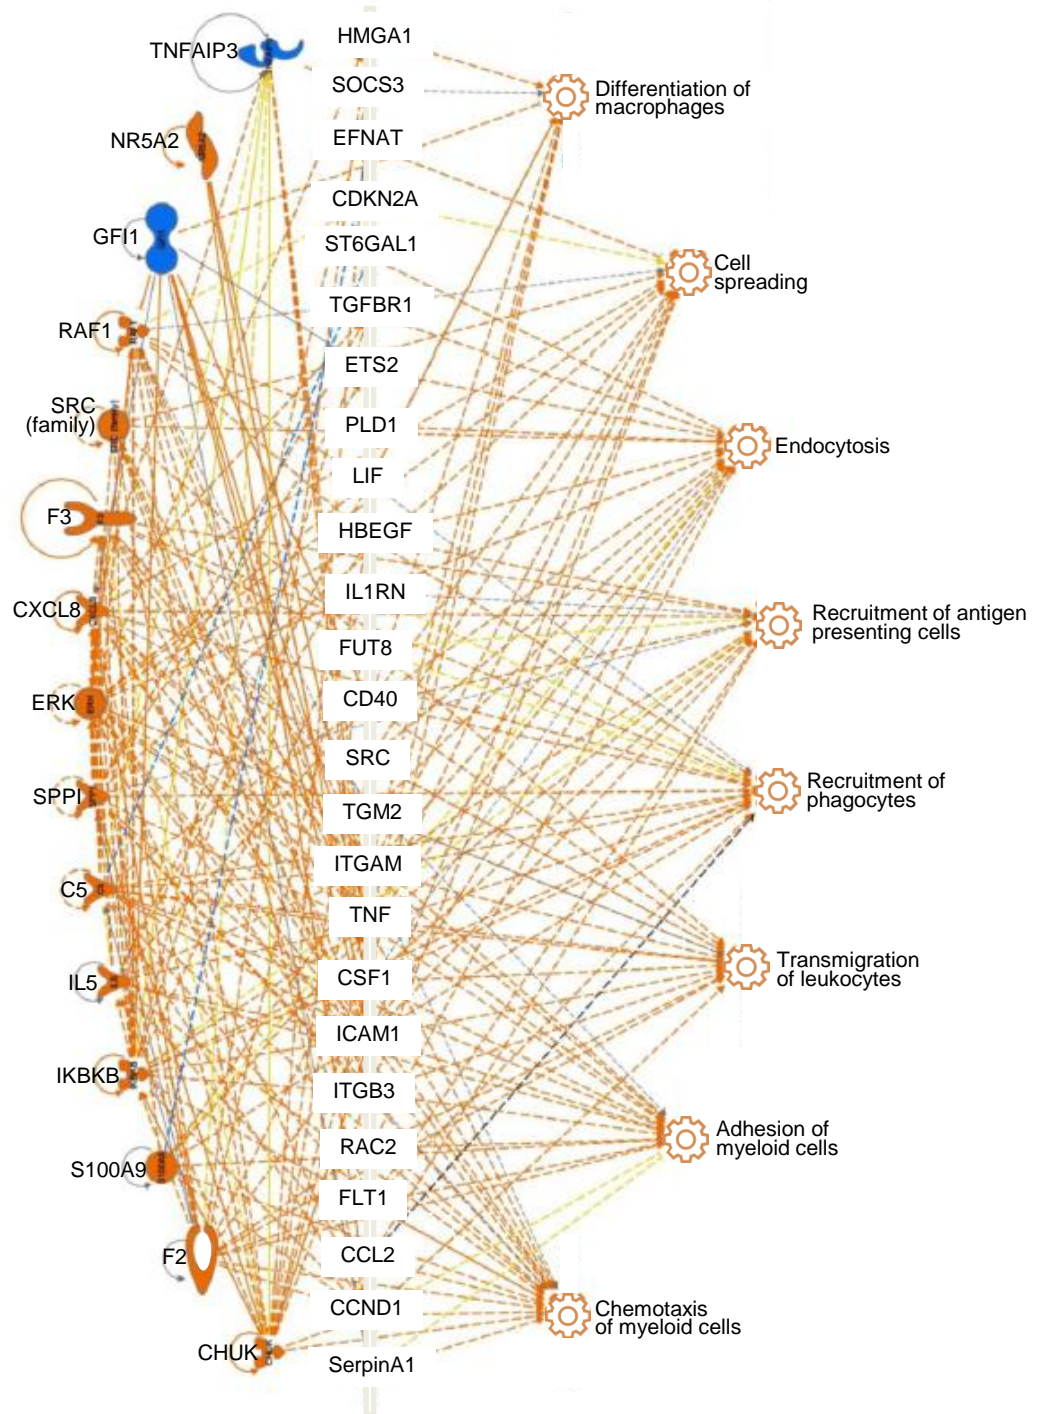

**Supplemental Figure 5. Analysis of gene and miR expression profiles of EV-MDSCs.** Ingenuity Pathway Analysis (IPA) of EV-MDSCs regulated genes targeted by miRs revealed a main network controlling functions of myeloid cells, including chemotaxis, adhesion, differentiation, recruitment of phagocytes, macrophages and antigen presenting cells, connecting 25 regulated genes to 15 upstream regulators.

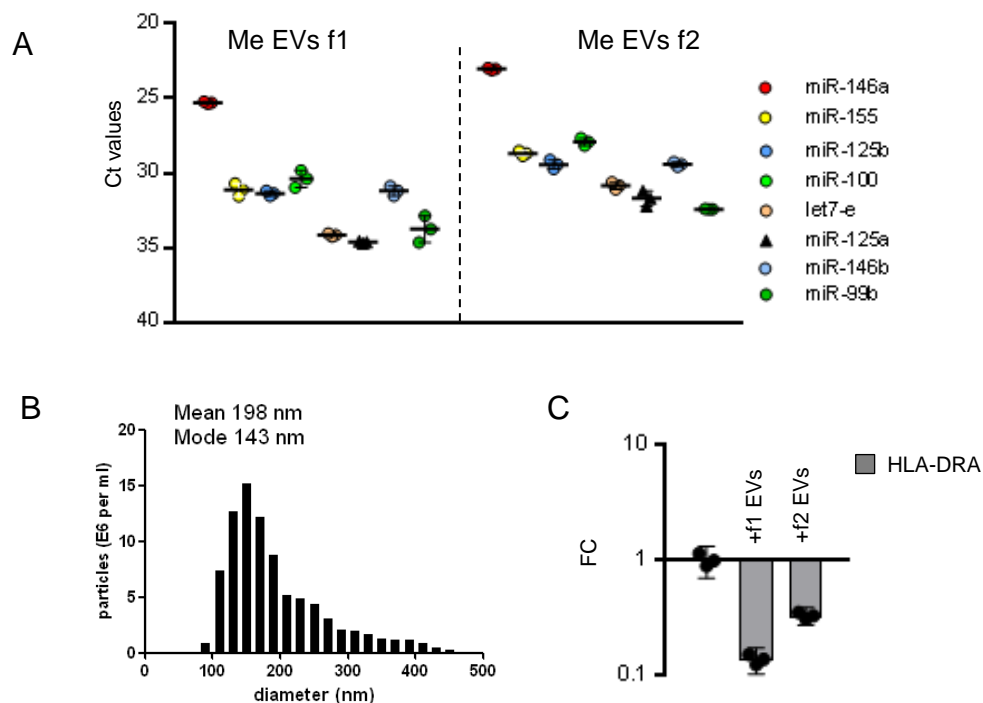

**Supplemental Figure 6. Melanoma EVs fractions.** (A) Expression of MDSC-miRs in f1 and f2 melanoma EV fractions. (B) Particle concentration and distribution of melanoma EVs in cell-depleted CM of INT12 melanoma cells measured by NTA. Representative data of 5 measurements is shown. (C) MDSC conversion of monocytes by f1 and f2 melanoma EVs. FC, fold change by using as calibrator untreated monocytes.  $P < 0.05$  by paired  $t$  test (C). Experiments in A and C were performed in triplicates and repeated twice.

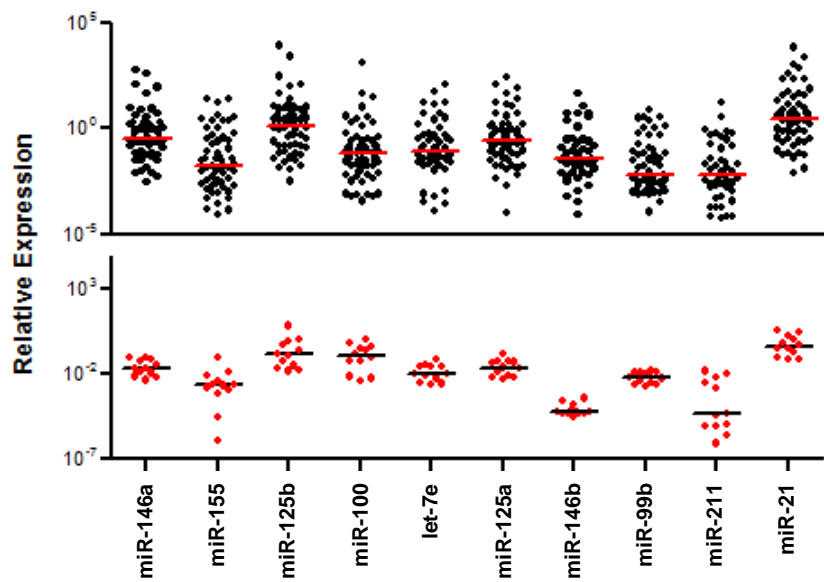

**Supplemental Figure 7. MDSC-miR expression in melanoma.** miR expression levels in metastatic specimens (upper panel, black dots) and in melanoma cell lines (lower panel, red dots). Melanoma specimens, n=58; melanoma cell lines, n=12. miR-21 and miR-211 were included as unrelated positive control miRs. Relative expression levels and median are shown, as resulting from  $2^{-\Delta Ct}$  (log10) values.

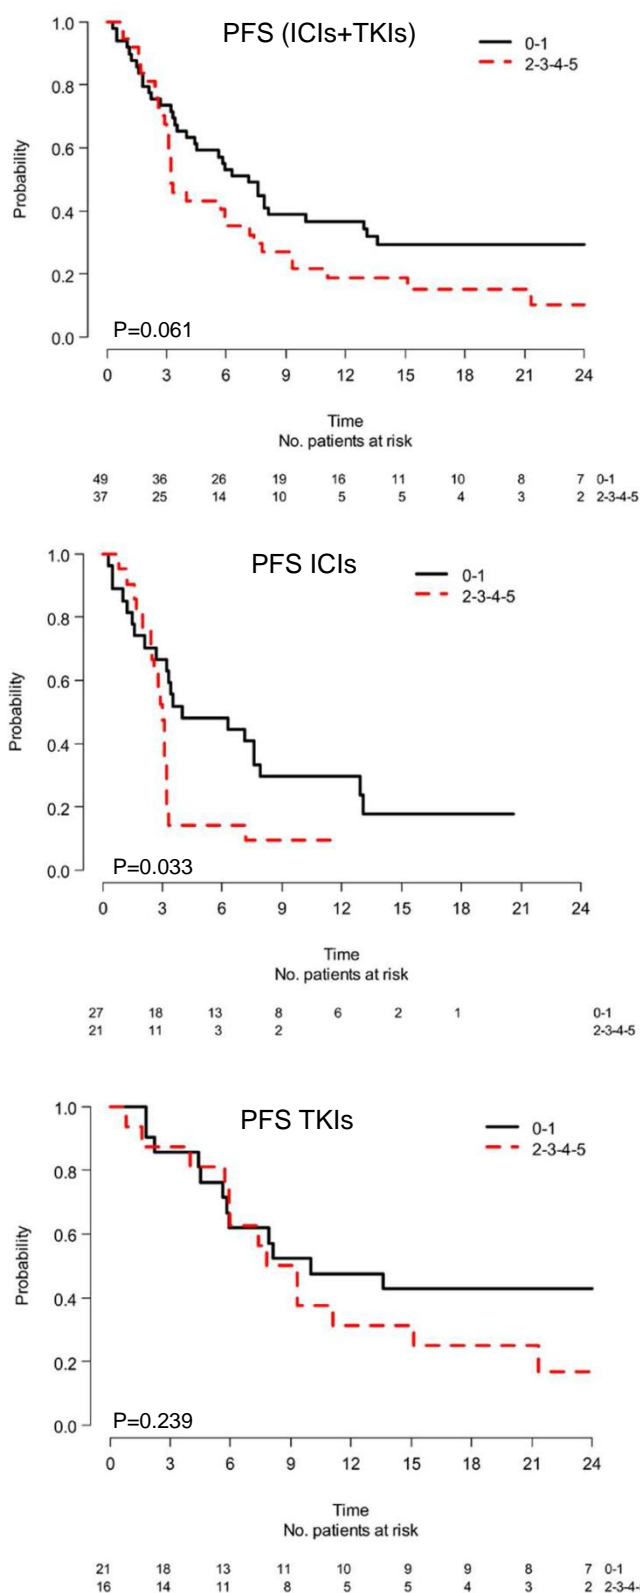

**Supplemental Figure 8. MDSC-miR plasma levels associate to resistance to immunotherapy.** Progression free survival (PFS) of metastatic melanoma patients based on the expression levels of MDSC-miRs in plasma samples obtained at baseline of therapy, assessed by multivariable index score approach and AIM, in the global population (n=86; for one patient of the global population PFS was missing; upper panel) and in the subsets of patients receiving immunotherapy (ICIs, n=48) or targeted therapy (TKIs, n=37). One patient was excluded from the latter analysis because receiving chemotherapy. Patients with low scores (0-1; showing no or only one increased miR) had a significantly better PFS with respect to patients with high scores (2-5; having 2-5 increased miRs) only if receiving ICIs. Kaplan-Meier survival curves with Log-rank p-values are shown.
